# Supplementary material
Source: publisher site journal article supplement (https://www.dovepress.com/article/404438)
Supplement: Supplementary file 1 [file get_supplementary_file.php]

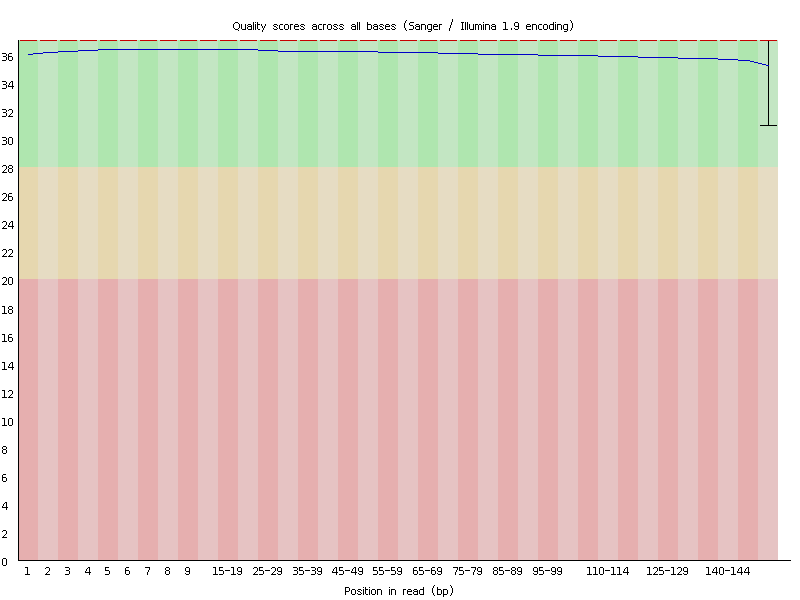


Figure S1 Raw data base quality

Note: Paired-end sequencing data are displayed separately: the abscissa is the base position of reads, and the ordinate is the corresponding base quality (represented by Q value). The base quality distribution of the corresponding position is displayed by boxplot. The background color is divided into three parts: green, yellow and red according to the base quality from good to bad, which visually shows the base quality.


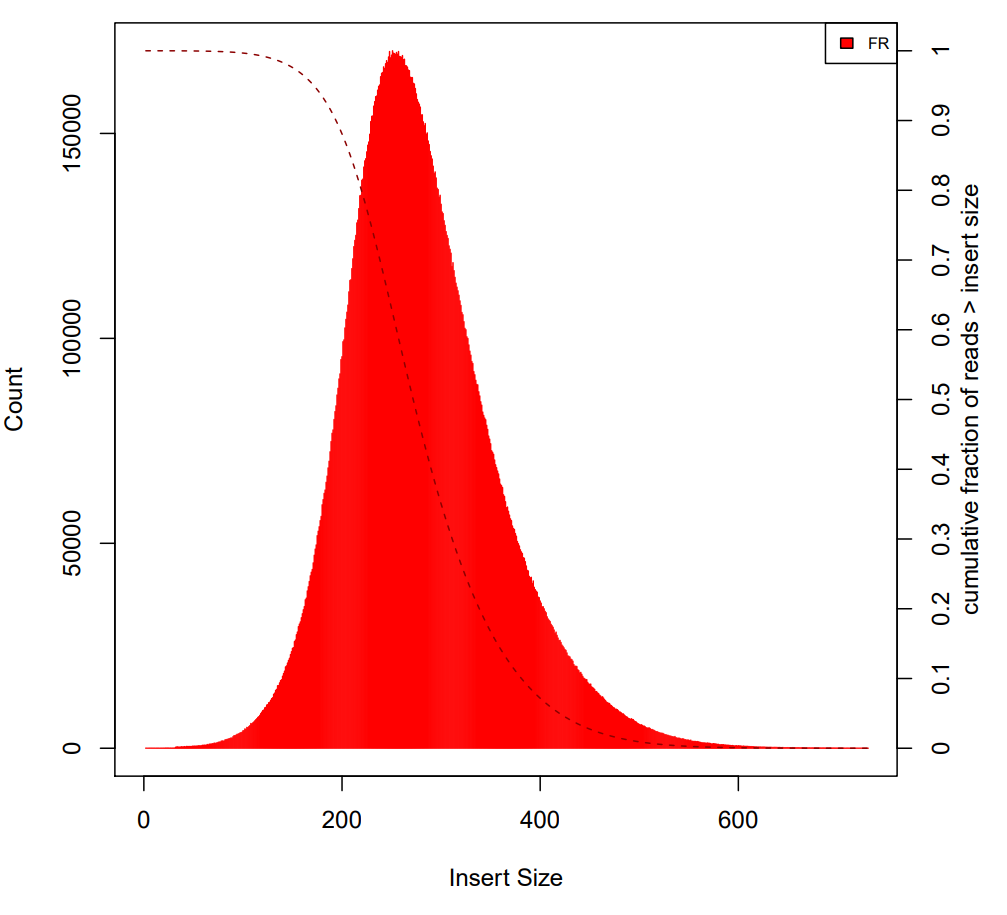


Figure S2 Fragment length distribution statistics of interrupted sequences during library construction.

Note: The abscissa is the insert length of the sequencing reads. The red shaded part in the figure represents the number of fragments with a specific insert length, corresponding to the left ordinate, and the red dotted line represents the proportion of fragments larger than the specific insert length, corresponding to the right ordinate.

Table S1 Whole-exome sequencing data statistics

| Sample | R1 | | | | | R2 | | | | |
| --- | --- | --- | --- | --- | --- | --- | --- | --- | --- | --- |
| Total Reads | Reads length | Q20 | Q30 | BaseCount (M) | Total Reads | Reads length | Q20 | Q30 | BaseCount (M) |
| VSD-1 | 28753750 | 15-151 | 99.98 % | 97.65 % | 4297.27 | 28753750 | 15-151 | 99.88 % | 97.98 % | 4290.48 |
| VSD-2 | 27379763 | 15-151 | 99.98 % | 97.60 % | 4094.84 | 27379763 | 15-151 | 99.87 % | 97.50 % | 4088.21 |
| VSD-3 | 41366945 | 15-151 | 99.98 % | 97.59 % | 6177.25 | 41366945 | 15-151 | 99.89 % | 97.92 % | 6166.98 |
| VSD-4 | 40162777 | 15-151 | 99.98 % | 96.80 % | 6008 | 40162777 | 15-151 | 99.82 % | 94.24 % | 5998.41 |
| VSD-5 | 22877832 | 15-151 | 99.98 % | 97.46 % | 3425.21 | 22877832 | 15-151 | 99.85 % | 95.64 % | 3419.74 |
| VSD-6 | 33865429 | 15-151 | 99.98 % | 96.61 % | 5066.02 | 33865429 | 15-151 | 99.84 % | 94.94 % | 5058.06 |
| VSD-7 | 28146816 | 15-151 | 99.98 % | 96.69 % | 4209.86 | 28146816 | 15-151 | 99.83 % | 94.73 % | 4203.21 |
| VSD-8 | 27907226 | 15-151 | 99.98 % | 96.76 % | 4175.64 | 27907226 | 15-151 | 99.82 % | 93.87 % | 4168.77 |
| VSD-9 | 28588314 | 15-151 | 99.98 % | 96.72 % | 4278.68 | 28588314 | 15-151 | 99.83 % | 94.73 % | 4271.75 |
| VSD-10 | 30256806 | 15-151 | 99.98 % | 96.81 % | 4525.17 | 30256806 | 15-151 | 99.85 % | 94.65 % | 4518.05 |
| VSD-11 | 28769827 | 15-151 | 99.98 % | 96.69 % | 4301.25 | 28769827 | 15-151 | 99.83 % | 94.86 % | 4294.39 |
| VSD-12 | 28487315 | 15-151 | 99.98 % | 96.82 % | 4261.58 | 28487315 | 15-151 | 99.85 % | 94.42 % | 4254.75 |
| VSD-13 | 24636731 | 15-151 | 99.98 % | 96.94 % | 3683.67 | 24636731 | 15-151 | 99.84 % | 95.66 % | 3677.68 |
| VSD-14 | 26341401 | 15-151 | 99.98 % | 96.87 % | 3938.05 | 26341401 | 15-151 | 99.81 % | 94.61 % | 3931.68 |
| VSD-15 | 30311173 | 15-151 | 99.98 % | 96.69 % | 4531.25 | 30311173 | 15-151 | 99.82 % | 95.12 % | 4524.3 |
| VSD-16 | 33245327 | 15-151 | 99.98 % | 96.64 % | 4972.70 | 33245327 | 15-151 | 99.82 % | 94.91 % | 4964.90 |
| VSD-17 | 29647648 | 15-151 | 99.98 % | 96.86 % | 4435.38 | 29647648 | 15-151 | 99.84 % | 95.58 % | 4428.18 |
| VSD-18 | 55771808 | 15-151 | 99.98 % | 96.83 % | 8347.29 | 55771808 | 15-151 | 99.86 % | 94.84 % | 8333.93 |
| VSD-19 | 25886272 | 15-151 | 99.98 % | 97.16 % | 3865.35 | 25886272 | 15-151 | 99.83 % | 95.45 % | 3859.34 |
| VSD-20 | 26195558 | 15-151 | 99.98 % | 97.01 % | 3913.30 | 26195558 | 15-151 | 99.83 % | 94.52 % | 3907.24 |

Note: ‘Total Reads’ and ‘Read Length’ represent the original sequence number and sequencing read length, ‘Q20 (%)’ and ‘Q30 (%)’ represent the sequences whose sequencing quality Q is not lower than 20 and 30 in the original data, respectively proportion.

Table S2 BWA comparison results

| Sample | The total number of reads participating in the genome alignment | The number of reads aligned to the genome | Comparison ratio | Number of bases aligned to the genome | 10X percentage of bases covered |
| --- | --- | --- | --- | --- | --- |
| VSD-1 | 57507500 | 57223381 | 0.995059 | 8486461509 | 0.969870 |
| VSD-2 | 54759526 | 54448172 | 0.994314 | 8075412756 | 0.974369 |
| VSD-3 | 82733890 | 82300393 | 0.994760 | 12188358850 | 0.956932 |
| VSD-4 | 80325554 | 79590409 | 0.990848 | 11778617119 | 0.991557 |
| VSD-5 | 45755664 | 45454920 | 0.993427 | 6741477407 | 0.976019 |
| VSD-6 | 67730858 | 67166539 | 0.991668 | 9945617439 | 0.987224 |
| VSD-7 | 56293632 | 55797209 | 0.991182 | 8259114571 | 0.981628 |
| VSD-8 | 34707396 | 34365774 | 0.990157 | 5080394828 | 0.933922 |
| VSD-9 | 35536528 | 35216622 | 0.990998 | 5211736819 | 0.949094 |
| VSD-10 | 38097090 | 37764484 | 0.991270 | 5581084100 | 0.958988 |
| VSD-11 | 35739458 | 35430166 | 0.991346 | 5234969355 | 0.942288 |
| VSD-12 | 35736992 | 35423124 | 0.991217 | 5236492534 | 0.946641 |
| VSD-13 | 34681364 | 34426324 | 0.992646 | 5093733681 | 0.902349 |
| VSD-14 | 36980786 | 36648033 | 0.991002 | 5418618946 | 0.937593 |
| VSD-15 | 42514152 | 42155978 | 0.991575 | 6234007381 | 0.953267 |
| VSD-16 | 37290000 | 36976646 | 0.991597 | 5468832264 | 0.942586 |
| VSD-17 | 32320918 | 32079631 | 0.992535 | 4746849962 | 0.915890 |
| VSD-18 | 63246710 | 62696503 | 0.991301 | 9286265299 | 0.985856 |
| VSD-19 | 51772544 | 51392441 | 0.992658 | 7599420850 | 0.971143 |
| VSD-20 | 52391116 | 51927213 | 0.991145 | 7673822452 | 0.972784 |
